# Supplementary material for: Supramolecular oligourethane gel as a highly selective fluorescent “on–off–on” sensor for ions
Source: Royal Society of Chemistry journal article supplement (doi:10.1039/d0tc02381g), 2020-01-01
Supplement: d0tc02381g1.pdf [file d0tc02381g1.pdf]

## Supporting Information

Supramolecular oligourethane gel as a highly selective fluorescent  
“on-off-on” sensor for ions

Yulin Feng,<sup>‡,a</sup> Nan Jiang,<sup>‡,a</sup> Dongxia Zhu,<sup>\*,a</sup> Zhongmin Su<sup>\*,a</sup> and Martin R.  
Bryce<sup>\*,b</sup>

<sup>a</sup> Key Laboratory of Nanobiosensing and Nanobioanalysis at Universities of Jilin Province,  
Department of Chemistry, Northeast Normal University, 5268 Renmin Street, Changchun,  
Jilin Province 130024, P. R. China

<sup>b</sup> Department of Chemistry, Durham University, Durham, DH1 3LE, UK

E-mail: m.r.bryce@durham.ac.uk

### Table of Contents:

1. Experimental details
2. Structural characterization of OU
3. Photophysical properties of OU

## 1. Experimental details

### General:

Materials obtained from commercial suppliers were used without further purification unless otherwise stated. All glassware, syringes, magnetic stirring bars, and needles were thoroughly dried in a convection oven.  $^1\text{H}$  NMR spectra were recorded at 25 °C on a Varian 500 MHz spectrometer and were referenced internally to the residual proton resonance in DMSO- $d_6$  ( $\delta$  2.5 ppm). The molecular weight of the polymer was calculated from its  $^1\text{H}$  NMR spectrum.<sup>S1</sup> The emission spectra were recorded using a F-7000 FL spectrophotometer. The infrared spectral data of the oligourethane were recorded using a Nicolet 6700-FTIR spectrometer. UV-vis absorption spectra were obtained by a Shimadzu UV-3100 spectrophotometer. X-ray diffraction (XRD) patterns of the samples were obtained with a Rigaku Dmax 2000. The scanning electron microscopy (SEM) images were obtained using a HITACHI SU8010.

### Cation and anion sensing studies:

Stock solutions of various ions, including  $\text{Na}^+$ ,  $\text{Ca}^{2+}$ ,  $\text{Co}^{2+}$ ,  $\text{Cu}^{2+}$ ,  $\text{Mn}^{2+}$ ,  $\text{Ni}^{2+}$ ,  $\text{Cr}^{3+}$ ,  $\text{La}^{3+}$ ,  $\text{Fe}^{3+}$ ,  $\text{Sr}^{2+}$ ,  $\text{Ce}^{3+}$ ,  $\text{Ag}^+$ ,  $\text{Al}^{3+}$ ,  $\text{Mg}^{2+}$ ,  $\text{Cd}^{2+}$ ,  $\text{Pb}^{2+}$ ,  $\text{Fe}^{2+}$ ,  $\text{HSO}_4^-$ ,  $\text{ClO}_4^-$ ,  $\text{I}^-$ ,  $\text{CN}^-$ ,  $\text{PF}_6^-$ ,  $\text{F}^-$ ,  $\text{Cl}^-$ ,  $\text{Br}^-$ ,  $\text{NO}_3^-$ ,  $\text{AcO}^-$  (using nitrate salts as the cation sources and tetrabutylammonium salts as the anion sources) were prepared in water at concentrations of 0.2 M, respectively. The cations sensing measurements of **OUG** (10%) were carried out by sequentially adding a different cationic solution to immerse gels in a ceramic colorimetric dish. The fluorescence spectra of the resultant metallogels were then recorded at room temperature. The fluorescence measurements of **OUG** were carried out by sequentially adding a different anionic solution. The measuring procedures for **OUG** were the same as for **OUG**.

### Method for detection limit calculation:

The limit of detection (LOD) was calculated using the equation  $3\delta/S$ , where  $\delta$  is the standard deviation (SD) for **OUG** intensity in the absence of  $\text{Fe}^{3+}$  on the **OUG** intensity in the absence of anions.  $S$  denotes the slope of the curve.

### Urea Addition Experiment:

A gel (10 wt %) in DMF was prepared and then urea (10 equiv.) was added to the gel vial and then the vial was heated to obtain a clear solution and then cooled to room temperature. No gel was formed after urea addition.

### Calculation method of absorbing rate:

The absorbing rate was calculated by the following equation:

$$\text{Absorbing rate \%} = (1 - c/c_0) \times 100\%$$

where  $c_0$  is the initial metal ion concentration in the absence of the **OUG**,  $c$  is the metal ion concentration after the treatment of the corresponding analyte.

### Synthesis of OU:

OU was synthesized by condensation polymerization between hexamethylene diisocyanate (A) and 4,4'-dihydroxybenzophenone (B) in the presence of polyethylene glycol monomethyl ether (PEG-200) (C) as the end-capper and 1,4-diazabicyclo[2.2.2]octane (DABCO) as the catalyst (Scheme S1). To make sure that the oligourethane chains were capped both ends by PEG, specific amounts were used of the two monomers and the end-capper satisfying the equation:  $2N_A = 2N_B + N_C$ , where  $N$  is the mole fraction of each component.

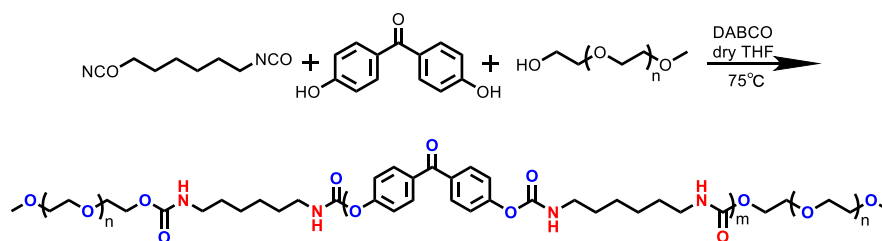

**Scheme S1** Synthesis of **OU**.

A mixture of 4,4'-dihydroxybenzophenone (2.62 mmol), DABCO (0.107 mmol) and anhydrous THF (8 mL) were added to a dried two-neck round-bottom flask. When they had almost dissolved into a transparent solution, PEG-200 (1.98 mmol) and hexamethylene

diisocyanate (3.61 mmol) were added to the mixed system in turn. The solution was heated at 75 °C for 8 h under nitrogen atmosphere until the clear solution became viscous, indicating polymerization had occurred. After cooling to room temperature, the crude product was washed with ethyl alcohol to give a white solid. This product was dried under vacuum for 24 h to obtain the resulting OU. Yield: 68%.  $^1\text{H}$  NMR (500 MHz,  $\text{DMSO-}d_6$ ,  $\delta$  [ppm]): 7.2/7.9 (s, 2H, -NH), 7.6-7.8 (broad, 4H), 7.23-7.34 (broad, 3H), 6.85-6.93 (broad, 1H), 4.04 (s, 4H), 3.40-3.61 (broad, PEG protons), 3.33 (s, 6H, PEG terminal  $-\text{OCH}_3$  protons), 2.91-3.14 (broad, 4H), 0.7-1.6 (broad, 8H). FTIR:  $3323\text{ cm}^{-1}$  (N-H),  $2936$  and  $2860\text{ cm}^{-1}$  ( $-\text{CH}_2$  -asymmetric and symmetric stretch),  $1706\text{ cm}^{-1}$  (C=O),  $1163\text{ cm}^{-1}$  (C-O-C stretch PEG).

It is known that the number-average molecular weight ( $M_n$ ) of end-functional polymers/oligomers can be obtained accurately using  $^1\text{H}$  NMR spectroscopy for end-group analysis.<sup>S2</sup> OU was characterized by  $^1\text{H}$  NMR spectra, in which all peaks could be assigned unambiguously (see above description). By comparing the integration of the peak for  $\text{H}_e$  (terminal groups  $-\text{CH}_3$  protons) and  $\text{H}_c$  (repeating unit  $\text{CH}_2$  protons), the degree of polymerization (DP) was found to be 3.6; and  $M_n$  was found to be  $1814\text{ g mol}^{-1}$  according to the following equation:

$$\overline{M}_n = M \overline{DP} + 2M_{\text{EG}}$$

where  $M$  and  $M_{\text{EG}}$  are the molecular weights of the repeat unit and end-group, respectively.

**Table S1:** Gelation Properties of OUG in Various Solvents.

| Entry | Solvent     | State <sup>a</sup> | CGC <sup>b</sup> (%) | $T_{\text{gel}}$ <sup>c</sup> |
|-------|-------------|--------------------|----------------------|-------------------------------|
| 1     | Water       | P                  | \                    | \                             |
| 2     | Acetone     | P                  | \                    | \                             |
| 3     | Methanol    | P                  | \                    | \                             |
| 4     | Ethanol     | P                  | \                    | \                             |
| 5     | Isopropanol | P                  | \                    | \                             |

---

|    |                                      |   |     |       |
|----|--------------------------------------|---|-----|-------|
| 6  | Acetonitrile                         | P | \   | \     |
| 7  | THF                                  | P | \   | \     |
| 8  | DMF                                  | G | 4   | 85-87 |
| 9  | N-propanol                           | P | \   | \     |
| 10 | CCl <sub>4</sub>                     | P | \   | \     |
| 11 | N-hexane                             | P | \   | \     |
| 12 | Diethyl ether                        | P | \   | \     |
| 13 | CH <sub>2</sub> Cl <sub>2</sub>      | P | \   | \     |
| 14 | CHCl <sub>3</sub>                    | P | \   | \     |
| 15 | CH <sub>2</sub> ClCH <sub>2</sub> Cl | P | \   | \     |
| 16 | Petroleum<br>Ether                   | P | \   | \     |
| 17 | Ethyl acetate                        | P | \   | \     |
| 18 | DMSO                                 | G | 4.5 | 60-62 |
| 19 | N-butyl<br>Alcohol                   | P | \   | \     |
| 20 | Methylbenzene                        | P | \   | \     |
| 21 | Hexamethylene                        | P | \   | \     |

---

<sup>a</sup> G, P and S denote gelation, precipitation and solution, respectively;

<sup>b</sup> The critical gelation concentration (wt %, 10 mg/mL = 1.0 %);

<sup>c</sup> The gelation temperature (°C).

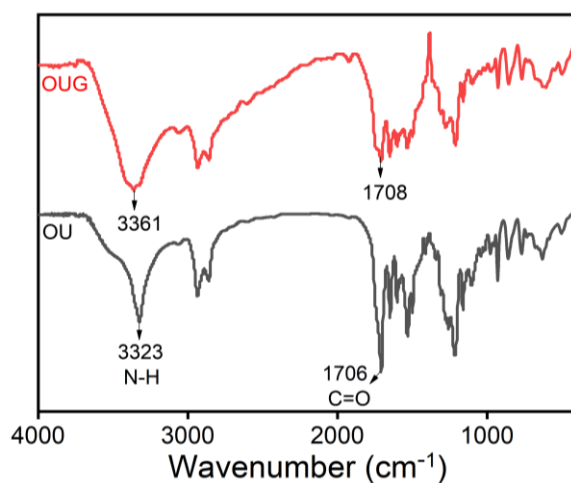

**Fig. S1** FTIR spectra of OU and OUG.

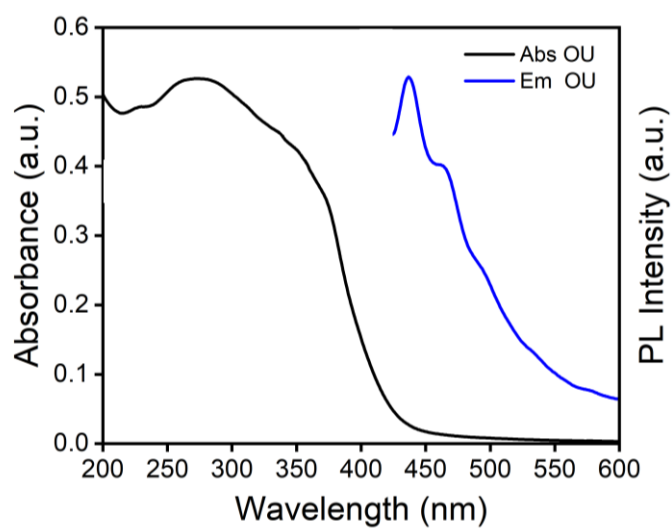

**Fig. S2** Absorption and emission spectra of OU in the solid state at room temperature.

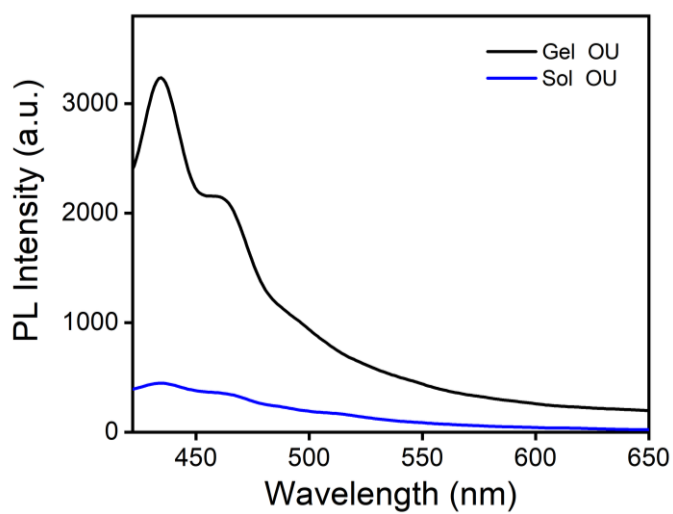

**Fig. S3** PL spectra of OU in gel and sol states.

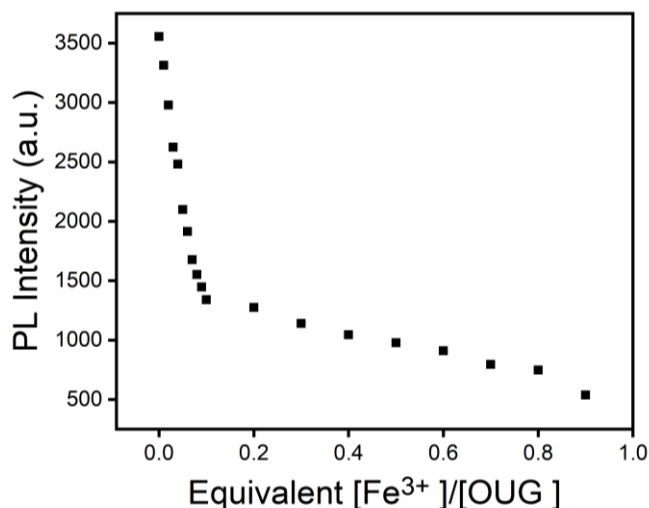

**Fig. S4** A plot of emission at 384 nm versus number of equivalents of  $\text{Fe}^{3+}$ .

The result of the analysis is as follows:

$$\text{Linear Equation: } Y = -27282.37X + 3807.94$$

$$R^2 = 0.9922$$

$$S = 2.7282 \times 10^{10}$$

$$\delta = \sqrt{\frac{\sum_{i=1}^N (F_i - \bar{F})^2}{N-1}} = 53.56$$

$$(N = 20) \quad K = 3$$

$$\text{LOD} = K \times \delta/S = 5.89 \times 10^{-9} \text{ M}$$

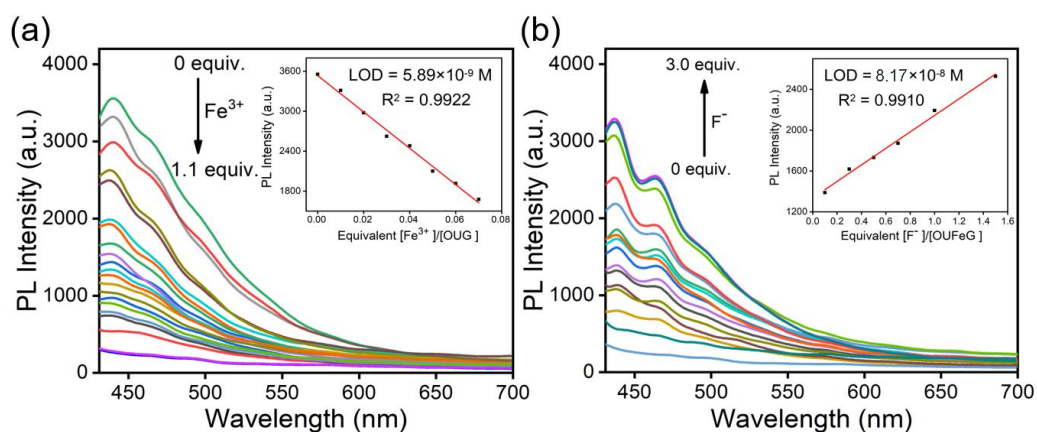

**Fig. S5** (a) Fluorescence spectra of **OUG** with increasing amounts of  $\text{Fe}^{3+}$ . (b) Fluorescence spectra of **OUFEG** with increasing concentrations of  $\text{F}^-$  ( $\lambda_{\text{ex}} = 384 \text{ nm}$ ). Insert: The corresponding linear graph.

**Table S2** Comparison of the Analytical Performance of the Fluorescence Sensing Systems for ions.

| ions             | Refs             | Fluorescent materials                                             | LOD                                               |
|------------------|------------------|-------------------------------------------------------------------|---------------------------------------------------|
| $\text{Fe}^{3+}$ | S3               | Carbon Nanodots                                                   | $4 \times 10^{-8} \text{ M}$                      |
|                  | S4               | MIL-53 (Al)                                                       | $9 \times 10^{-7} \text{ M}$                      |
|                  | S5               | Nap-Glc                                                           | $4.27 \times 10^{-8} \text{ M}$                   |
|                  | S6               | Furfuran-based Rhodamine B<br>Fluorescent Chemosensor             | $2.5 \times 10^{-8} \text{ M}$                    |
|                  | S7               | Ultrabright N/P Codoped<br>Carbon Dots                            | $3.3 \times 10^{-7} \text{ M}$                    |
|                  | S8               | Rhodamine B<br>Derivative-functionalized<br>Graphene Quantum Dots | $2 \times 10^{-8} \text{ M}$                      |
|                  | S9               | Eu(III)-functionalized MIL-124                                    | $2.8 \times 10^{-7} \text{ M}$                    |
|                  | <b>This work</b> | <b>Oligourethane Gel (OUG)</b>                                    | <b><math>5.89 \times 10^{-9} \text{ M}</math></b> |
| $\text{F}^-$     | S10              | Luminescent Iridium(III)<br>Chemosensor                           | $7.2 \times 10^{-7} \text{ M}$                    |
|                  | S11              | Reactive Fluorogenic Probes                                       | $1.14 \times 10^{-6} \text{ M}$                   |
|                  | S12              | 2-(hydroxy)-naphthyl Imino<br>Functionalized Pillar[5]arene       | $1.34 \times 10^{-7} \text{ M}$                   |
|                  | S13              | Coumarin-based Colorimetric and<br>Fluorescent Chemosensor        | $9.2 \times 10^{-6} \text{ M}$                    |
|                  | S14              | Boron-dipyrromethene<br>Chemosensor                               | $9.3 \times 10^{-8} \text{ M}$                    |
|                  | <b>This work</b> | <b>Oligourethane Gel (OUG)</b>                                    | <b><math>8.17 \times 10^{-8} \text{ M}</math></b> |
| $\text{HSO}_4^-$ | S15              | Coumarin-based Fluorescent<br>Sensor                              | $3.75 \times 10^{-6} \text{ M}$                   |
|                  | S16              | Styrylindolium Dyes                                               | $1.0 \times 10^{-6} \text{ M}$                    |
|                  | S17              | Schiff Base                                                       | $2.4 \times 10^{-7} \text{ M}$                    |

|  |                  |                                                    |                                                   |
|--|------------------|----------------------------------------------------|---------------------------------------------------|
|  | S18              | BODIPY-derived Multi-channel Polymeric Chemosensor | $1.12 \times 10^{-6} \text{ M}$                   |
|  | S19              | Benzothiazole Based Schiff-base-A                  | $3.2 \times 10^{-8} \text{ M}$                    |
|  | <b>This work</b> | <b>Oligourethane Gel (OUG)</b>                     | <b><math>1.16 \times 10^{-8} \text{ M}</math></b> |

**Table S3** The AAS data of gel **OUG** with  $\text{Fe}^{3+}$ .

| Ion              | Initial concentration (M) | Residual concentration (M) | Absorbing rate % |
|------------------|---------------------------|----------------------------|------------------|
| $\text{Fe}^{3+}$ | $1.0 \times 10^{-5}$      | $2.5 \times 10^{-7}$       | 97.5             |
| $\text{Fe}^{3+}$ | $1.0 \times 10^{-4}$      | $1.05 \times 10^{-5}$      | 89.5             |

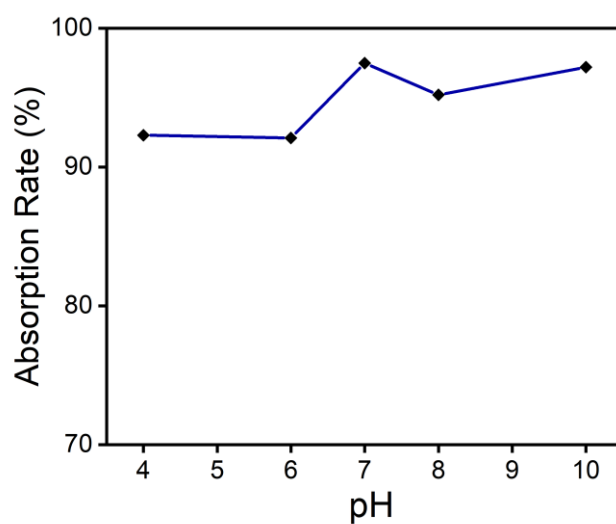

**Fig. S6** The absorption rates of **OUG** toward  $\text{Fe}^{3+}$  ( $1 \times 10^{-5} \text{ mol L}^{-1}$  in 10 mL water) at different pH.

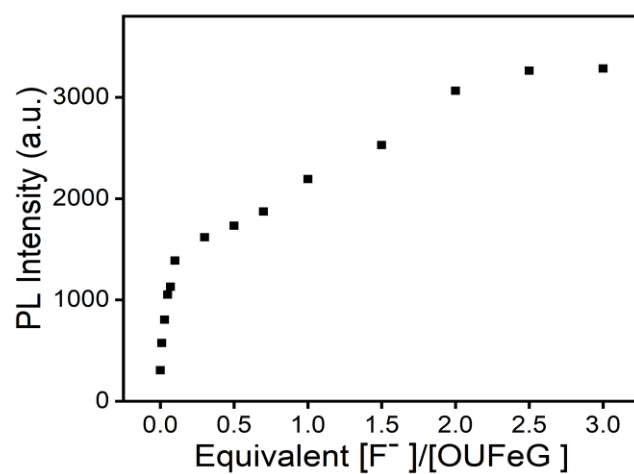

**Fig. S7** A plot of emission at 384 nm versus number of equivalents of  $F^-$ .

The result of the analysis as follows:

Linear Equation:  $Y = 808.49X + 1336.53$

$$R^2 = 0.9910$$

$$S = 8.0849 \times 10^8$$

$$\delta = \sqrt{\frac{\sum_{i=1}^N (F_i - \bar{F})^2}{N-1}} = 22$$

$$(N = 20) \quad K = 3$$

$$LOD = K \times \delta/S = 8.17 \times 10^{-8} \text{ M}$$

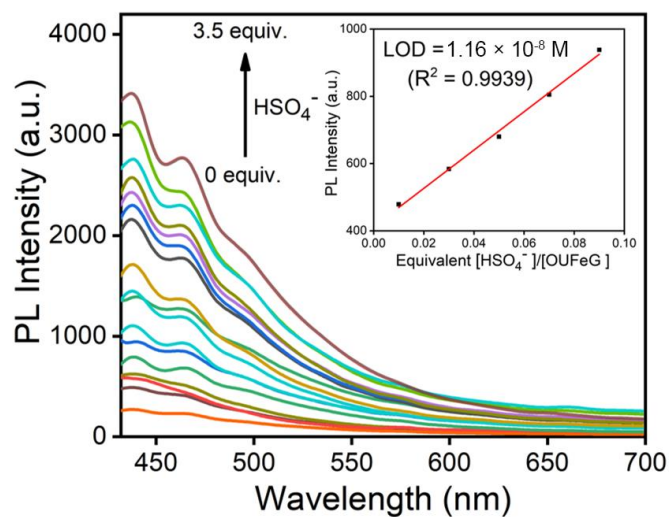

**Fig. S8** Fluorescence spectra of **OUG** with increasing concentrations of  $\text{HSO}_4^-$  ( $\lambda_{\text{ex}} = 384\text{nm}$ ). Insert: The corresponding linear graph.

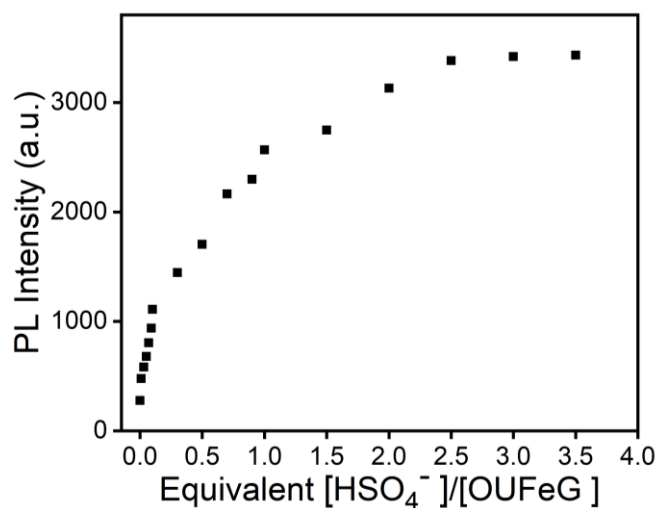

**Fig. S9** A plot of emission at 384 nm versus number of equivalents of  $\text{HSO}_4^-$ .

$$\text{Linear Equation: } Y = 5695X + 412.45$$

$$R^2 = 0.9939$$

$$S = 5.695 \times 10^9$$

$$\delta = \sqrt{\frac{\sum_{i=1}^N (F_i - \bar{F})^2}{N-1}} = 22$$

$$(N = 20) \quad K = 3$$

$$\text{LOD} = K \times \delta / S = 1.16 \times 10^{-8} \text{ M}$$

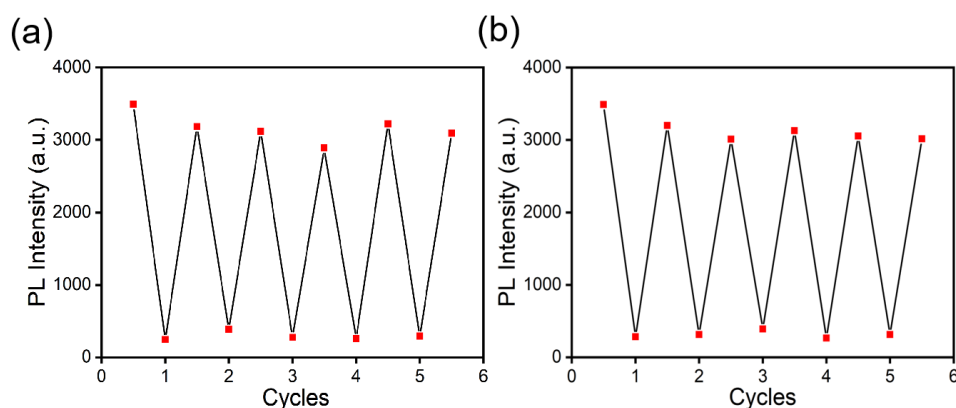

**Fig. S10** Fluorescent “on-off-on” cycles of **OUG**, controlled by the alternating addition of (a)  $\text{Fe}^{3+}$  and  $\text{F}^-$ , (b)  $\text{Fe}^{3+}$  and  $\text{HSO}_4^-$  ( $\lambda_{\text{ex}} = 384 \text{ nm}$ ).

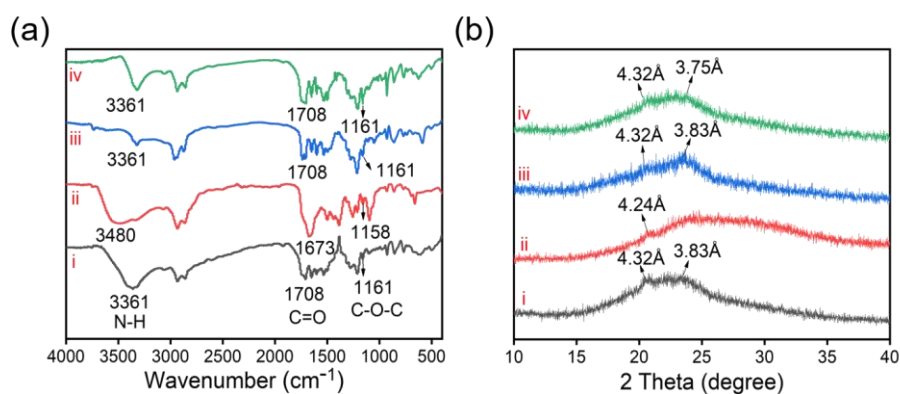

**Fig. S11** (a) FTIR spectra of (i) **OUG** (ii) **OUFEG** (iii) **OUFEG** +  $\text{HSO}_4^-$  and (iv) **OUFEG** +  $\text{F}^-$ , (b) powder XRD patterns of (i) **OUG** (ii) **OUFEG** (iii) **OUFEG** +  $\text{HSO}_4^-$  and (iv) **OUFEG** +  $\text{F}^-$ .

## References

- S1 N. Jiang, G. Li, W. Che, D. Zhu, Z. Su and M. R. Bryce, *J. Mater. Chem. C*, 2018, **6**, 11287-11291.
- S2 M. J. Robb, D. Montarnal, N. D. Eisenmenger, S.-Y. Ku, M. L. Chabinyc, and C. J. Hawker, *Macromolecules*, 2013, **46**, 6431-6438.
- S3 P. Miao, Y. Tang, K. Han and B. Wang, *J. Mater. Chem. A*, 2015, **3**, 15068-15073.
- S4 C.-X. Yang, H.-B. Ren and X.-P. Yan, *Anal. Chem.*, 2013, **85**, 7441-7446.
- S5 F. Liu, P. Tang, R. Ding, L. Liao, L. Wang, M. Wang and J. Wang, *Dalton Trans.*, 2017, **46**, 7515-7522.

- 
- S6 T. Zhou, X. Chen, Q. Hua, W. Lei, Q. Hao, B. Zhou, C. Su, and X. Bao, *Sens. Actuators, B*, 2017, **253**, 292-301.
- S7 J. Shangguan, J. Huang, D. He, X. He, K. Wang, R. Ye, X. Yang, T. Qing, and J. Tang, *Anal. Chem.*, 2017, **89**, 7477-7484.
- S8 R. Guo, S. Zhou, Y. Li, X. Li, L. Fan, and N. H. Voelcker, *ACS Appl. Mater. Interfaces*, 2015, **7**, 23958-23966.
- S9 X.-Y. Xu and B. Yan, *ACS Appl. Mater. Interfaces*, 2015, **7**, 721-729.
- S10 J.-B. Liu, W. Wang, G. Li, R.-X. Wang, C.-H. Leung, and D.-L. Ma, *ACS Omega*, 2017, **2**, 9150-9155.
- S11 J. Hu, T. Liu, H.-W. Gao, S. Lu, K. Uvdal, and Z. Hu, *Sens. Actuators, B*, 2018, **269**, 368-376.
- S12 W. Zhu, H. Fang, J.-X. He, W.-H. Jia, H. Yao, T.-B. Wei, Q. Lin and Y.-M. Zhang, *New J. Chem.*, 2018, **42**, 11548-11554.
- S13 S. Biswas, M. Gangopadhyay, S. Barman, J. Sarkar, and N. P. Singh, *Sens. Actuators, B*, 2016, **222**, 823-828.
- S14 S. Madhu and M. Ravikanth, *Inorg. Chem.*, 2014, **53**, 1646-1653.
- S15 H. J. Kim, S. Bhuniya, R. K. Mahajan, R. Puri, H. Liu, K. C. Ko, J. Y. Lee and J. S. Kim, *Chem. Commun.*, **2009**, 7128-7130.
- S16 J. Chang, Y. Lu, S. He, C. Liu, L. Zhao and X. Zeng, *Chem. Commun.*, 2013, **49**, 6259-6261.
- S17 C.-Y. Lin, K.-F. Huang, and Y.-P. Yen, *Spectrochim. Acta, Part A*, 2013, **115**, 552-558.
- S18 U. Haldar and H.-i Lee, *Polym. Chem.*, 2018, **9**, 4882-4890.
- S19 I. Kaur, A. Khajuria, P. Ohri, P. Kaur, and K. Singh, *Sens. Actuators, B*, 2018, **268**, 29-38.
